# Supplementary material for: Infigratinib in Patients with Recurrent Gliomas and FGFR Alterations: A Multicenter Phase II Study
Source: Oxford University Press journal article supplement (doi:10.1158/1078-0432.ccr-21-2664), 2022-03-28
Supplement: ccr-21-2664_figure_s4_suppfs4.docx [file ccr-21-2664_figure_s4_suppfs4.docx]

**Figure S4.** Kaplan-Meier plots of progression-free survival and overall survival (Full analysis set)

**Progression-free survival**


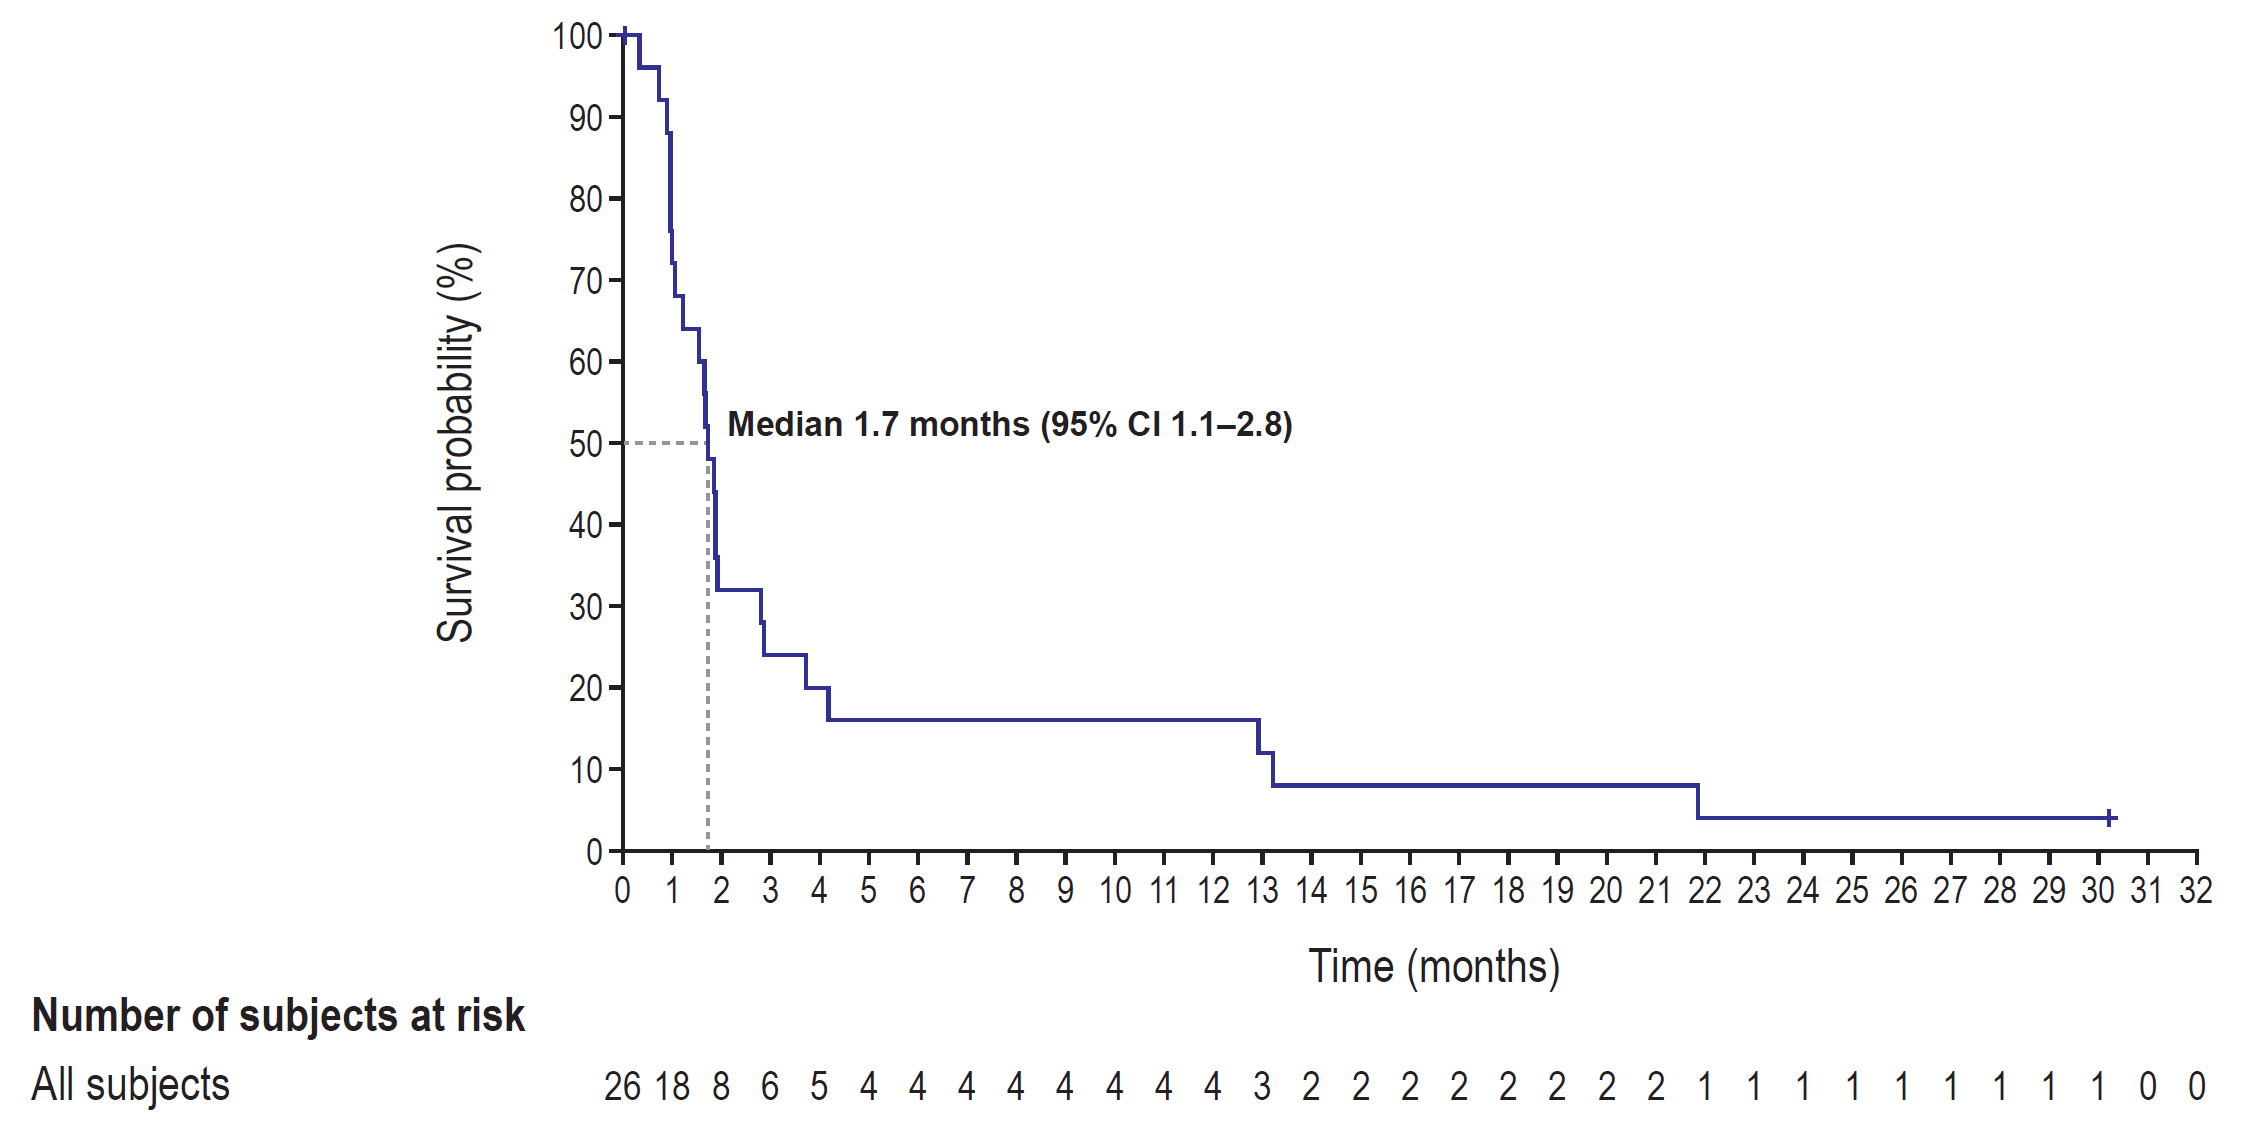


**Overall survival**


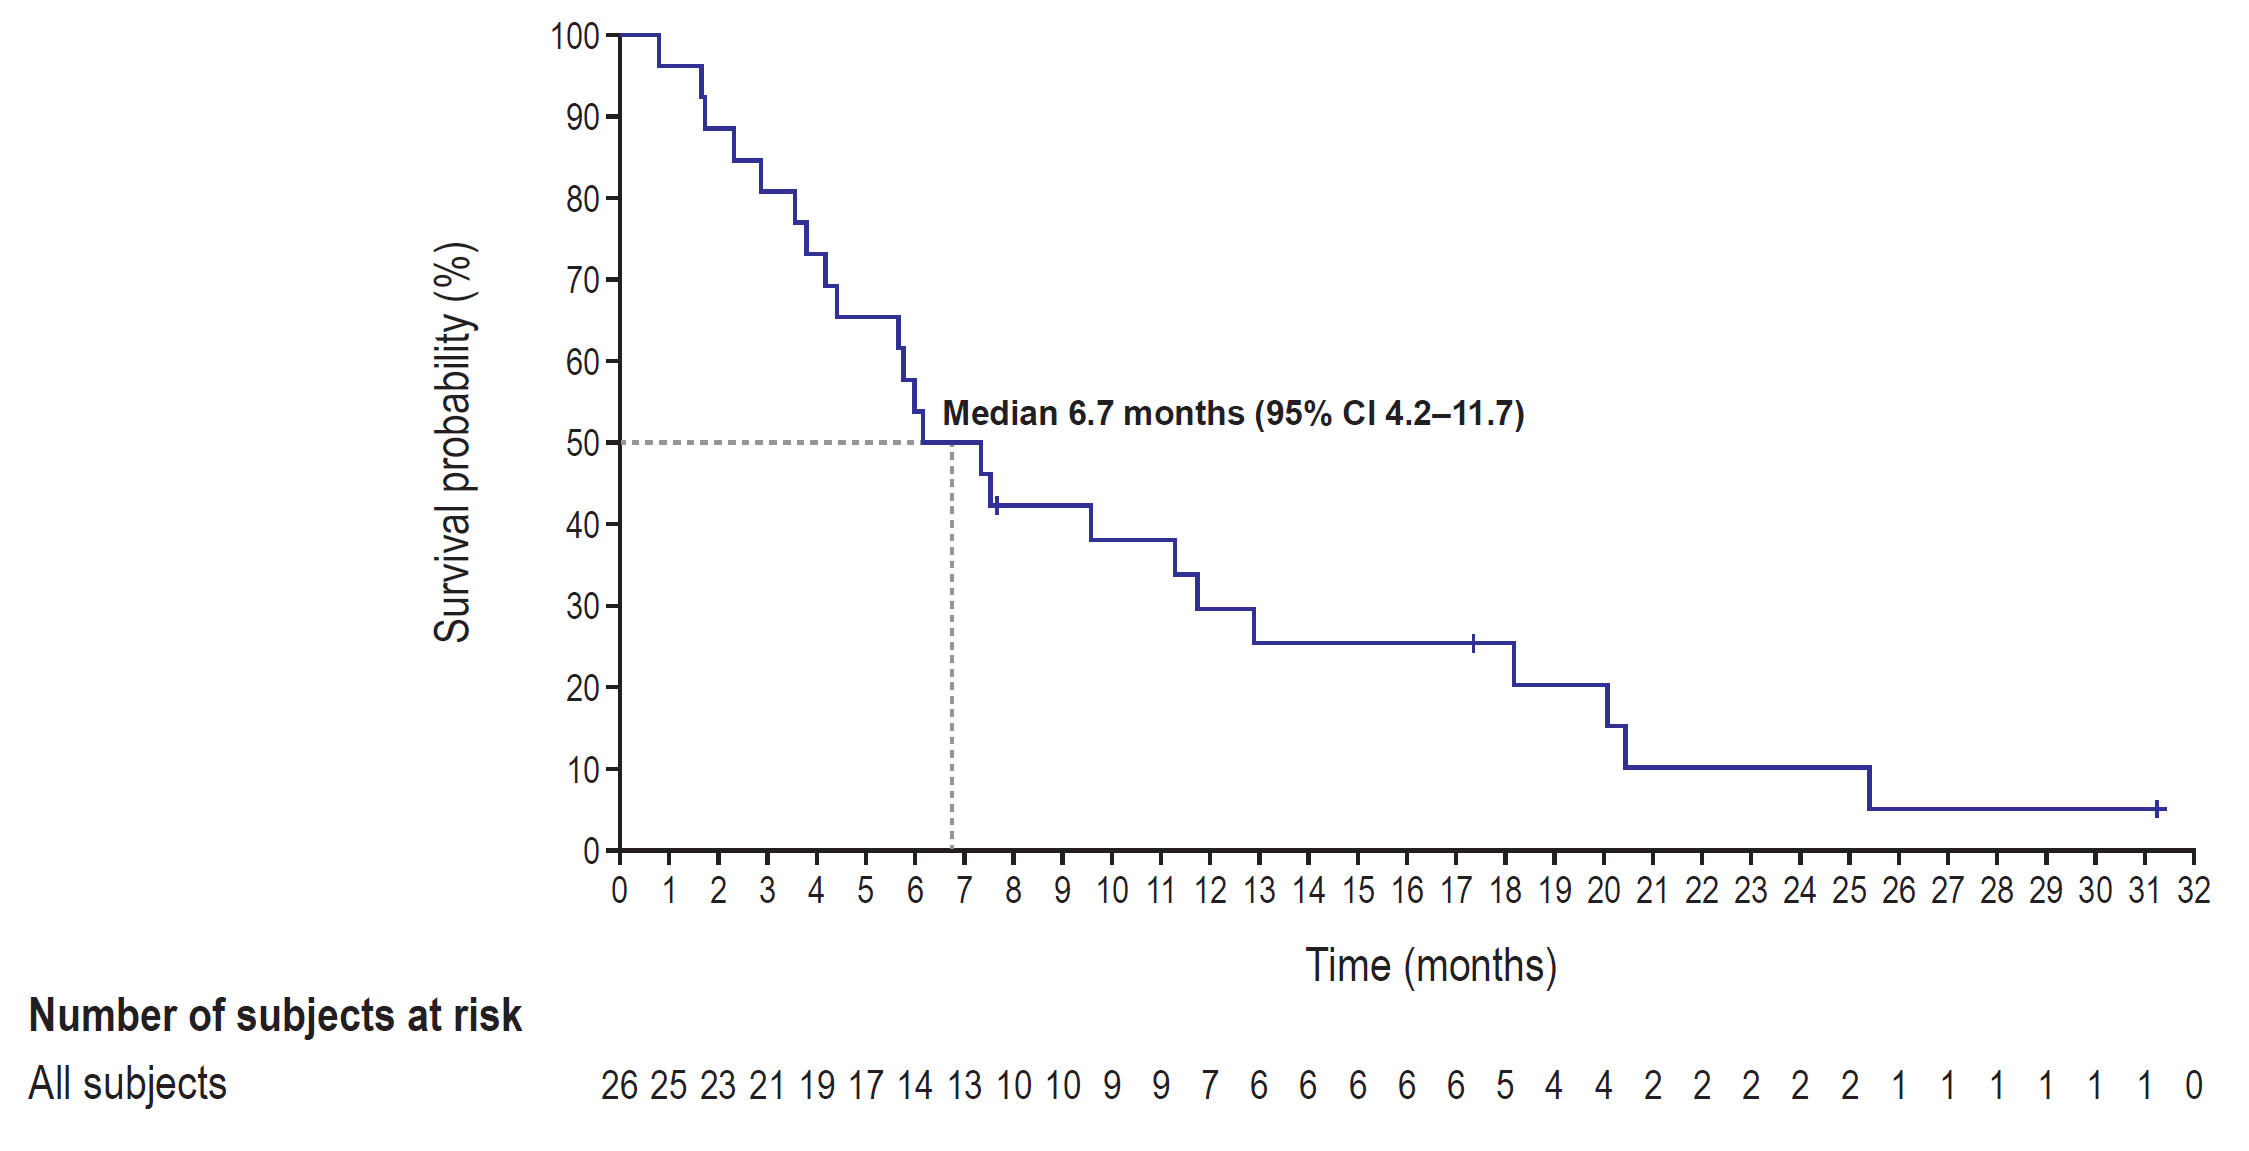


*Abbreviation:* CI, confidence interval
