# Supplementary figures and images for: Infigratinib in Patients with Recurrent Gliomas and FGFR Alterations: A Multicenter Phase II Study
Source: Oxford University Press journal article supplement (doi:10.1158/1078-0432.ccr-21-2664), 2022-03-28

**Figure S9.** Sequencing alignment of FGFR1, FGFR3 and FGFR3b


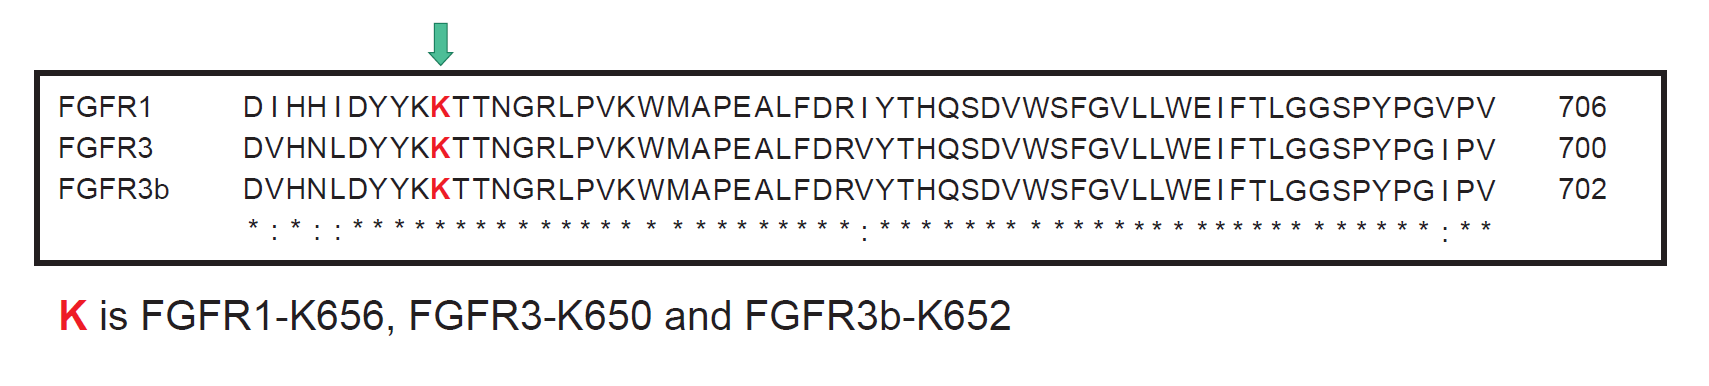

Supplement: ccr-21-2664_figure_s9_suppfs9.docx [file ccr-21-2664_figure_s9_suppfs9.docx]
